# Supplementary material for: Rhus coriaria induces senescence and autophagic cell death in breast cancer cells through a mechanism involving p38 and ERK1/2 activation
Source: PubMed Central journal article supplement (PMC4532997; doi:10.1038/srep13013), 2015-08-12
Supplement: srep13013-s1.pdf [file srep13013-s1.pdf]

## ***Supplementary Figures and Table***

### ***Rhus coriaria* induces senescence and autophagic cell death in breast cancer cells through a mechanism involving p38 and ERK1/2 activation**

**Hussain El Hasasna<sup>q1</sup>, Khawlah Athamneh<sup>q1</sup>, Halima Al Samri<sup>q1</sup>, Nushad Karuvantevida<sup>1</sup>, Yusra Al Dhaheer<sup>1</sup>, Soleiman Hisaindee<sup>2</sup>, Gaber Ramadan<sup>1</sup>, Nedaa Al Tamimi<sup>1</sup>, Synan AbuQamar<sup>1</sup>, Ali Eid<sup>3\*</sup> and Rabah Iratni<sup>1\*</sup>**

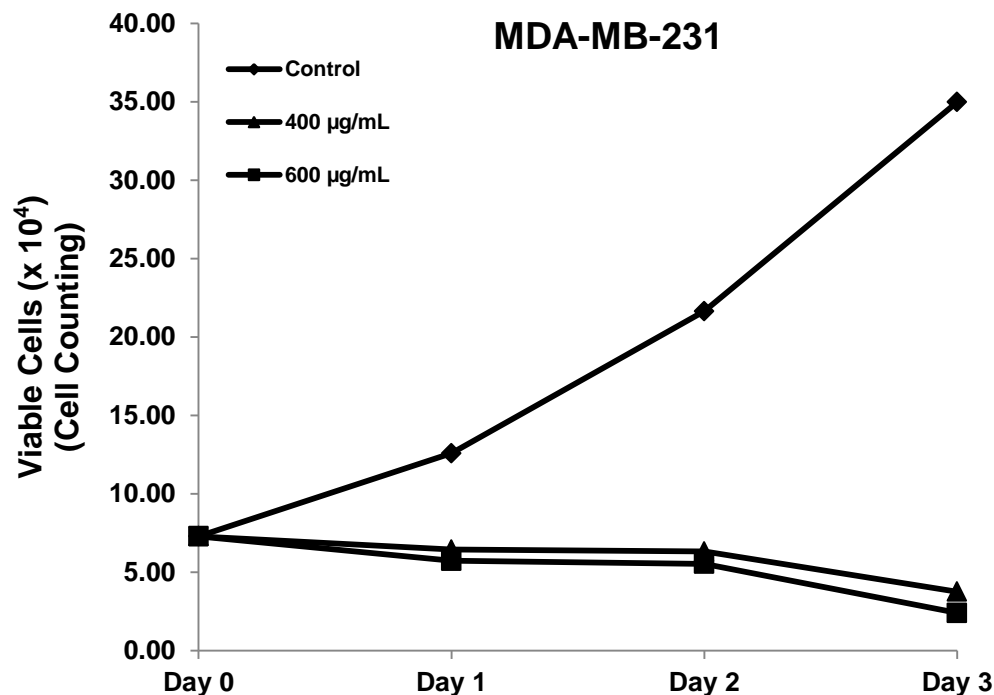

| Total Viable Cells ( x 10 <sup>4</sup> ) |             |              |             |             |
|------------------------------------------|-------------|--------------|-------------|-------------|
|                                          | Day 0       | Day 1        | Day 2       | Day 3       |
| Control                                  |             | 12.60 ± 0.37 | 21.65 ± 2   | 35.0 ± 1.6  |
| 400 µg/mL                                | 7.30 ± 0.39 | 6.45 ± 0.27  | 6.33 ± 0.09 | 3.77 ± 0.45 |
| 600 µg/mL                                |             | 5.74 ± 0.22  | 5.55 ± 0.5  | 2.41 ± 0.36 |

**Figure S1. Inhibition of cellular viability by *Rhus coriaria*.** Exponentially growing MDA-MB-231 cells were treated with and without the indicated concentrations of RCE for 1, 2 and 3 days. Viability monitored by counting the number of viable cells as described in Materials and Methods. Data represent the mean of three independent experiments carried out in triplicate.

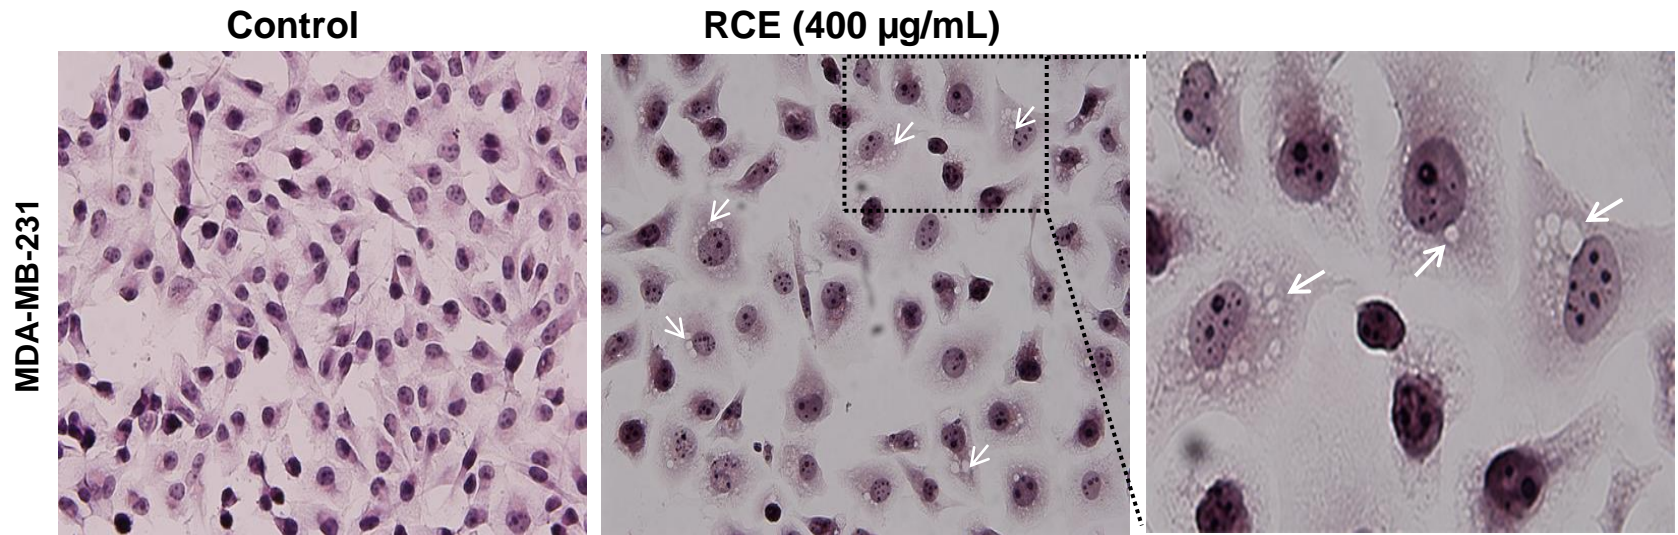

**Figure S2. *Rhus coriaria* induces massive cytoplasmic vacuolation in MDA-MB-231 cells.** MDA-MB-231 cells were treated for 48 with RCE (400  $\mu\text{g}/\text{mL}$ ) and then stained with Eosin-Hemtoxylin as described in Materials and Methods.

| <b>IC<sub>50</sub> (µg/mL)</b> |             |             |            |
|--------------------------------|-------------|-------------|------------|
|                                | <b>24 h</b> | <b>48 h</b> | <b>72h</b> |
| <b>MDA-MB-231</b>              | <b>437</b>  | <b>305</b>  | <b>283</b> |
| <b>T47D</b>                    | <b>374</b>  | <b>261</b>  | <b>229</b> |
| <b>MCF-7</b>                   | <b>ND</b>   | <b>510</b>  | <b>433</b> |

**Supplementary table 1:** IC50 values determined for each cell at the indicated time of treatment.
